# Supplementary material
Source: PubMed Central journal article supplement (PMC6439856)
Supplement: jamasurg-154-9-s001.pdf [file jamasurg-154-9-s001.pdf]

« ASSESMENT OF THE SELICK MANEUVER IN RAPID  
SEQUENCE INDUCTION OF GENERAL ANESTHESIA»

**PHRC IRIS**

**BIOMEDICAL RESEARCH PROTOCOL**

Version 1.1 September 21, 2013

Project code : P120120

IDRCB : 2013-A00624-41

**Principal Investigator**

Dr BIRENBAUM Aurélie

Groupe Hospitalier Pitié-Salpêtrière Département d'Anesthésie Réanimation

47-83 Bld de l'hôpital

75651 PARIS Cedex 13

Tel : (33) 1 42 17 73 29

Fax : (33) 1 42 17 73 88

Email : [titibiran@gmail.com](mailto:titibiran@gmail.com)

**Scientific leader**

Pr RIOU Bruno

Groupe Hospitalier Pitié-Salpêtrière Service d'Accueil des Urgences

47-83 Bld de l'hôpital

75651 PARIS Cedex 13

Tel : (33) 1 42 17 72 49

Fax : (33) 1 42 17 73 88

Email : [bruno.riou@aphp.fr](mailto:bruno.riou@aphp.fr)

**Research promoter**

Assistance Publique - Hôpitaux de Paris,

DRCD, Carré Historique de l'Hôpital Saint Louis

1 avenue Claude Vellefaux 75475 PARIS Cedex 10

Project leader: Didier BOUTON

Tel : (33) 1 44 84 17 44

Fax : (33) 1 44 84 17 01

Courriel : [didier.bouton@aphp.fr](mailto:didier.bouton@aphp.fr)

**Clinical Research Unit (URC) : Pitié Salpêtrière - Charles-Foix**

Chief : Pr. Alain MALLET

47-83 Bd de l'Hôpital 75651 Paris Cedex 13 – France

Téléphone : 01 42 16 05 05

Tel : (33) 1 42 16 05 13

Project leader: Jessica PALMYRE

Tel : (33) 1 42 16 24 40

Email : [jessica.palmyre@aphp.fr](mailto:jessica.palmyre@aphp.fr)

**Page of biomedical research PROTOCOL SIGNATURE**  
**By the principal investigator and the promoter representative**

Biomedical Research Code : P120120

IDRCB : 2013-A00624-41

« ASSESMENT OF THE SELICK MANEUVER IN RAPID SEQUENCE INDUCTION OF  
GENERAL ANESTHESIA»

*IRIS study*

Version N° 1.1 September 21, 2013

**Principal Investigator:**

Dr BIRENBAUM Aurélie

Groupe Hospitalier Pitié-Salpêtrière  
Département d'Anesthésie Réanimation  
47-83 Bld de l'hôpital  
75651 PARIS Cedex 13

Date : ...../...../.....

Signature :

**Scientific leader :**

Pr. RIOU Bruno

Groupe Hospitalier Pitié-Salpêtrière  
Département d'Anesthésie Réanimation  
47-83 Bld de l'hôpital  
75651 PARIS Cedex 13

Date : ...../...../.....

Signature :

**Promotion :**

Mr. MISSE Christophe

Assistance Publique – Hôpitaux de Paris  
Délégation Interrégionale à la recherche clinique  
Hôpital Saint Louis  
75010 PARIS

Date : ...../...../.....

Signature :

*This version corresponds to the protocol version and its appendix sent to the CPP and appropriate authorities concerning ethical approval and authorization to perform a biomedical research .*

68 **LIST OF CENTERS**

69 Center 001 – Groupe Hospitalier Pitié Salpêtrière – Service d’Anesthésie-Réanimation, Pr  
70 CORIAT

---

71 47-83 Bld de l’hôpital  
72 75651 PARIS Cedex 13  
73 Dr BIRENBAUM Aurélie  
74 Email : [titibiran@gmail.com](mailto:titibiran@gmail.com)

76 Center 002 – CHU Amiens - Picardie – Service d’Anesthésie-Réanimation, Pr DUPONT

---

77 Avenue Laennec  
78 80054 Amiens  
79 Pr DUPONT Hervé  
80 Email : [dupont.herve@chu-amiens.fr](mailto:dupont.herve@chu-amiens.fr)

82 Center 003 – CHU Bobigny - Hôpital Avicenne – Service d’Anesthésie-Réanimation, Pr  
83 BELOUCIF

---

84 125 Rue de Stalingrad  
85 93000 Bobigny  
86 Pr BELOUCIF Sadek  
87 Email: [sadek.beloucif@aphp.fr](mailto:sadek.beloucif@aphp.fr)

89 Center 004 – CHU Bichat - Hôpital Bichat – Service d’Anesthésie-Réanimation, Pr.  
90 MONTRAVERS

---

91 46 Rue Henri Huchard  
92 75018 Paris  
93 Pr MONTRAVERS Philippe  
94 Courriel : [philippe.montravers@aphp.fr](mailto:philippe.montravers@aphp.fr)

96 Center 005 – CHU Bicêtre - Hôpital Bicêtre – Service d’Anesthésie-Réanimation, Pr  
97 BENHAMOU

---

98 78 Rue du Général Leclerc  
99 94275 Le KREMLIN BICETRE CEDEX  
100 Pr BENHAMOU Dan  
101 Email : [dan.benhamou@bct.aphp.fr](mailto:dan.benhamou@bct.aphp.fr)

103 Center 006 – CHU Bordeaux - Hôpital Pellegrin – Pôle des Urgences – SAMU/SMUR, Dr  
104 REVEL

---

105 Place Amélie Raba Léon, 33076 Bordeaux  
106 Pr BIAIS Matthieu  
107 Email : [matthieu.biais@chu-bordeaux.fr](mailto:matthieu.biais@chu-bordeaux.fr)

109 Center 007 – Hôpital Beaujon – Service d’Anesthésie-Réanimation, Pr MANTZ

---

110 100, Bd du Général Leclerc  
111 92110 Clichy  
112 Pr PAUGAM BURTZ Catherine  
113 Email : [catherine.paugam@bjn.aphp.fr](mailto:catherine.paugam@bjn.aphp.fr)

115 Center 008 – CHU Lille - Hôpital Roger Salengro 2 – Pôle des Urgences, Pr FOURRIER

---

116 2 avenue Oscar Lambret  
117 59037 Lille  
118 Dr GARRIGUE HUET Delphine  
119 Email : [del.garrigue@gmail.com](mailto:del.garrigue@gmail.com)

120

121 Center 009 – CHU Nîmes - Service d'Anesthésie-Réanimation, Pr RIPART

---

122 4 rue du Professeur Debré

123 30000 Nîmes

124 Pr RIPART Jacques

125 Email : [jacques.ripart@chu-nimes.fr](mailto:jacques.ripart@chu-nimes.fr)

126

127 Center 010 – CHU Rouen - Hôpital Charles Nicolle – Pôle d'Anesthésie-

128 Réanimation/SAMU, Pr DUREUIL

---

129 1 rue de Germont

130 76000 ROUEN

131 Pr COMPERE Vincent

132 Email : [vincent.compere@chu-rouen.fr](mailto:vincent.compere@chu-rouen.fr)

133

134

135

136

137

138

|     |                                                                                              |                                     |
|-----|----------------------------------------------------------------------------------------------|-------------------------------------|
| 140 | <b>BIOMEDICAL RESEARCH PROTOCOL SIGNATURE .....</b>                                          | <b>2</b>                            |
| 141 | <b>1. GENERAL INFORMATION.....</b>                                                           | <b>7</b>                            |
| 142 | <b>1.1 SUMMARY .....</b>                                                                     | <b>7</b>                            |
| 143 | <b>2. SCIENTIFIC RATIONALE AND GENERAL DESCRIPTION OF THE RESEARCH.....</b>                  | <b>9</b>                            |
| 144 | <b>2.1 STATE OF KNOWLEDGE .....</b>                                                          | <b>9</b>                            |
| 145 | <b>2.2 LITERATURE REVIEW AND PREREQUISITE.....</b>                                           | <b>9</b>                            |
| 146 | 2.2.1 <i>Pulmonary aspiration and anesthesia.....</i>                                        | <i>9</i>                            |
| 147 | 2.2.2 <i>Prevention of aspiration risk.....</i>                                              | <i>10</i>                           |
| 148 | 2.2.3 <i>The Sellick maneuver .....</i>                                                      | <i>11</i>                           |
| 149 | <b>2.3 SUMMARY OF KNOWN BENEFITS AND FORESEEABLE RISKS TO RESEARCH SUBJECTS .....</b>        | <b>11</b>                           |
| 150 | 2.3.1 <i>Risks associated with anesthesia with rapid sequence induction.....</i>             | <i>11</i>                           |
| 151 | 2.3.2 <i>Risks associated with the Sellick maneuver.....</i>                                 | <i>12</i>                           |
| 152 | <b>3. RESEARCH OBJECTIVES.....</b>                                                           | <b>12</b>                           |
| 153 | <b>3.1 TESTED HYPOTHESIS.....</b>                                                            | <b>13</b>                           |
| 154 | <b>3.2 PRIMARY OBJECTIVE .....</b>                                                           | <b>13</b>                           |
| 155 | <b>3.3 SECONDARY OBJECTIVE.....</b>                                                          | <b>13</b>                           |
| 156 | <b>4. RESEARCH DESIGN.....</b>                                                               | <b>14</b>                           |
| 157 | <b>4.1. TYPE OF STUDY.....</b>                                                               | <b>14</b>                           |
| 158 | <b>4.2. PRECIS STATEMENT OF THE PRIMARY END POINT AND, WHERE APPLICABLE, SECONDARY END</b>   |                                     |
| 159 | <b>POINTS. 14</b>                                                                            |                                     |
| 160 | <b>4.3. DESCRIPTION OF THE RESEARCH METHODOLOGY, ACCOMPAGNIED BY A SCHEMATIC</b>             |                                     |
| 161 | <b>PRESENTATION SPECIFYING THE PLANNED VISITS AND EXAMINATIONS .....</b>                     | <b>15</b>                           |
| 162 | <b>4.4. DESCRIPTION OF THE MEASURES TAKEN TO REDUCE AND AVOID BIAS, INCLUDING IN</b>         |                                     |
| 163 | <b>PARTICULAR.. .....</b>                                                                    | <b>16</b>                           |
| 164 | <b>4.5. RESEARCH PARTICIPATION AND TOTAL EXPECTED RESEARCH TIME .....</b>                    | <b>17</b>                           |
| 165 | <b>4.6. SUMMARY TABLE OF THE CHRONOLOGY OF RESEARCH AND EXAMINATIONS CONDUCTED .....</b>     | <b>17</b>                           |
| 166 | <b>4.7. DESCRIPTION OF FINAL OR TEMPORARY STOP RULES .....</b>                               | <b>18</b>                           |
| 167 | <b>5. SELECTION AND EXCLUSION OF PATIENTS .....</b>                                          | <b>19</b>                           |
| 168 | <b>5.1 CRITERIA FOR INCLUSION OF PATIENTS .....</b>                                          | <b>19</b>                           |
| 169 | <b>5.2 CRITERIA FOR NON INCLUSION OF PATIENTS.....</b>                                       | <b>19</b>                           |
| 170 | <b>6. TREATMENT TO PATIENTS INCLUDED IN THE STUDY .....</b>                                  | <b>20</b>                           |
| 171 | <b>6.1 CONTROL GROUP : THE SELICK MANEUVER .....</b>                                         | <b>21</b>                           |
| 172 | <b>6.2 EXPERIMENTAL GROUP : THE FEIGNED SELICK MANEUVER .....</b>                            | <b>21</b>                           |
| 173 | <b>6.3 INDUCTION OF ANESTHESIA .....</b>                                                     | <b>22</b>                           |
| 174 | <b>6.4 DATA COLLECTED .....</b>                                                              | <b>23</b>                           |
| 175 | <b>7. SAFETY ASSEMENT .....</b>                                                              | <b>23</b>                           |
| 176 | <b>7.1 DESCRIPTION OF SAFETY EVALUATION PARAMETERS.....</b>                                  | <b>24</b>                           |
| 177 | <b>7.2 METHODS AND TIMETABLES FOR MEASURING, COLLECTING, AND ANALYSING SAFETY</b>            |                                     |
| 178 | <b>EVALUATION PARAMETERS .....</b>                                                           | <b>25</b>                           |
| 179 | <b>7.3 PROCEDURES FOR THE REGISTRATION AND REPORTING OF ADVERSE EVENTS .....</b>             | <b>26</b>                           |
| 180 | <b>7.4 MODALITIES AND DURATION OF FOLLOW-UP OF PATIENTS FOLLOWING THE OCCURRENCE OF AN</b>   |                                     |
| 181 | <b>ADVERSE EVENT.....</b>                                                                    | <b>28</b>                           |
| 182 | <b>8. STATISTICAL ANALYSIS .....</b>                                                         | <b>29</b>                           |
| 183 | <b>8.1 DESCRIPTION OF THE STATISTICAL METHODS ENVISAGED, INCLUDING THE TIMETABLE FOR THE</b> |                                     |
| 184 | <b>PLANNED INTERIM ANALYSIS. ....</b>                                                        | <b>29</b>                           |
| 185 | <b>8.2 SAMPLE SIZE ESTIMATION .....</b>                                                      | <b>29</b>                           |
| 186 | <b>8.3 EXPECTED NUMBER OF PATIENTS AT EACH RESEARCH CENTER WITH STATISTICAL</b>              |                                     |
| 187 | <b>JUSTIFICATION.....</b>                                                                    | <b>ERROR! BOOKMARK NOT DEFINED.</b> |
| 188 | <b>8.4 DEGREE OF STATISTICAL SIGNIFICANCE EXPECTED.....</b>                                  | <b>31</b>                           |
| 189 | <b>8.5 STATISTICAL CRITERIA FOR STOPPING RESEARCH (DESCRIBE ACCORDING TO THE MEDICAL</b>     |                                     |
| 190 | <b>CONTEXT OF RESEARCH).....</b>                                                             | <b>31</b>                           |
| 191 | <b>8.6 METHOD OF ACCOUNTING FOR MISSING, UNUSED, OR INVALID DATA. ....</b>                   | <b>31</b>                           |
| 192 | <b>8.7 MANAGEMENT OF CHANGES TO THE INITIAL STRATEGY PLAN.....</b>                           | <b>31</b>                           |

|     |      |                                                                     |    |
|-----|------|---------------------------------------------------------------------|----|
| 193 | 8.8  | CHOICE OF PATIENTS TO BE INCLUDED IN THE ANALYSES .....             | 31 |
| 194 | 9.   | RIGHT OF ACCESS TO SOURCE DATA AND DOCUMENTS.....                   | 31 |
| 195 | 10.  | QUALITY CONTROL.....                                                | 33 |
| 196 | 10.1 | MONITORING PROCEDURES .....                                         | 32 |
| 197 | 10.2 | TRANSCRIPTION OF DATA IN THE OBSERVATION BOOK.....                  | 33 |
| 198 | 11.  | LEGAL AND ETHICAL CONSIDERATIONS .....                              | 34 |
| 199 | 11.1 | APPLICATION FOR AUTHORISATION AFTER ANSM .....                      | 33 |
| 200 | 11.2 | REQUEST FOR ADVICE TO THE ETHICAL COMMITTEE (CPP) .....             | 33 |
| 201 | 11.3 | AMENDMENTS .....                                                    | 34 |
| 202 | 11.4 | CNIL DECLARATION.....                                               | 34 |
| 203 | 11.5 | INFORMATION NOTE AND INFORMED CONSENT .....                         | 35 |
| 204 | 11.6 | FINAL RESEARCH REPORT.....                                          | 35 |
| 205 | 12.  | PROCESSING OF DATA AND STORAGE OF RESEARCH DOCUMENTS AND DATA ..... | 35 |
| 206 | 13.  | INSURANCE AND SCIENTIFIC COMMITMENT .....                           | 36 |
| 207 | 13.1 | INSURANCE .....                                                     | 37 |
| 208 | 13.2 | SCIENTIFIC COMMITMENT .....                                         | 37 |
| 209 | 14.  | PUBLISHING RULES.....                                               | 37 |
| 210 | 15.  | REFERENCES .....                                                    | 38 |
| 211 | 16.  | APPENDIX : .....                                                    | 42 |
| 212 |      |                                                                     |    |
| 213 |      |                                                                     |    |
| 214 |      |                                                                     |    |
| 215 |      |                                                                     |    |
| 216 |      |                                                                     |    |
| 217 |      |                                                                     |    |

218 **1. GENERAL INFORMATION**

219 **1.1 Summary**

220 **Introduction:** Pulmonary aspiration occurs during general anesthesia because of the loss of  
221 the reflexes protecting airways. Its incidence is low during elective surgery, when  
222 preoperative fasting rules have been applied and in the absence of risk factors for  
223 regurgitation of gastric contents. In emergency conditions, non-compliance with preoperative  
224 fasting rules and delayed gastric emptying markedly increase the risk of pulmonary  
225 aspiration.<sup>5</sup> In this context, a rapid sequence induction of anesthesia is recommended to  
226 minimize the risk of aspiration, combining the use of a short acting hypnotic and a muscle  
227 relaxant associated with the application of a the Sellick maneuver). The goal of the Sellick  
228 maneuver is to compress the esophagus between the cricoid cartilage and the fifth cervical  
229 vertebra. This maneuver is recommended although its efficacy has been poorly documented,  
230 and thus remains controversial.

231 **Hypothesis:** The aim of this study is to assess the Sellick maneuver during rapid sequence  
232 induction in adults (pregnant women excluded) by comparing the incidence of pulmonary  
233 aspiration whether the maneuver is applied or sham, in a noninferiority trial.

234 **Primary end point:** Incidence of pulmonary aspiration in the operating room, as detected  
235 either at the glottis level during laryngoscopy or by tracheal aspiration just after tracheal  
236 intubation.

237 **Secondary end points :** Cormack et Lehane grade to assess the laryngeal exposure, incidence  
238 of difficult tracheal intubation, incidence of impossible tracheal intubation, effects of Sellick  
239 maneuver interruption on these 3 criteria, incidence of pneumonia during the first 24 hours,  
240 traumatic complications related to Sellick maneuver (esophageal and cricoid cartilage  
241 ruptures), mortality at hospital discharge or 28 days.

242 **Methods:** Multicenter, randomized, double-blind study. The two groups only differ by the  
243 application of the Sellick maneuver or a sham procedure.

244 **Number of patients:** Noninferiority trial. The number of patients to be included is estimated  
245 at 1,750 per group, a total of 3,500.

246 **Inclusion criteria:** Any patient requiring a rapid sequence induction of general anesthesia.  
247 Written informed consent obtained from the patient or a close relative/surrogate. In case of  
248 emergency conditions and if such a person was absent, the patient was randomized according  
249 to the specifications of emergency consent authorized by the ethical committee and the patient  
250 was asked to give his/her consent for the continuation of the trial when his/her condition  
251 allowed.

252 **Exclusion criteria :** Patients <18 years-old, pregnancy, contraindication of the Sellick  
253 maneuver or succinylcholine administration, clinical signs of pneumonia during the pre-

254 anesthesia visit, severe pulmonary contusion, upper respiratory tract abnormalities, patients  
255 requiring an alternative technique for tracheal intubation, consciousness abnormalities,  
256 decision to use a plastic blade for laryngoscopy, decision to use rocuronium for rapid  
257 induction sequence, inclusion in another randomized trial, lack of national health care  
258 insurance.

259 **Conclusion:** The application of the Sellick manoeuver during rapid sequence induction of  
260 anesthesia is aimed to reduce the risk of pulmonary aspiration of gastric content. If, when the  
261 Sellick maneuver is not performed, the risk of pulmonary aspiration is not increased, it would  
262 be possible to avoid it and thus to not expose patients to its related adverse effects and known  
263 complications.

264  
265



266 **2. SCIENTIFIC RATIONALE AND GENERAL DESCRIPTION OF THE**  
267 **RESEARCH**

268

269 **2.1 State of knowledge**

270 Loss of consciousness induced by general anesthesia is associated with loss of reflexes  
271 that protect the airway and thus is associated with an increased risk of gastric content  
272 regurgitation and pulmonary aspiration. Therefore, anesthesia of a patient with a full stomach  
273 presents a risk of pulmonary aspiration.

274 The incidence of anesthesia-induced pulmonary aspiration is variable. It is absent in  
275 case of loco-regional anesthesia. The incidence is very low in elective surgery when  
276 preoperative fasting rules have been followed and in the absence of risk factors for  
277 regurgitation of gastric contents (esophageal reflux, hiatus hernia, gastroparesia, previous  
278 gastric surgery, pregnancy etc....)<sup>1</sup> and markedly increases in emergency surgery performed  
279 under general anesthesia.<sup>2,3</sup> In emergency conditions, delayed gastric emptying associated  
280 with conditions cited above (ileus), non-compliance with preoperative fasting rules, pain,  
281 anxiety, and use of opioids are considered as risk factors that markedly increase the risk of  
282 pulmonary aspiration.<sup>1</sup> To limit this risk, loco-regional anesthesia should be preferred if  
283 feasible.<sup>2</sup> In the other cases, the anesthesia technique should reduce the delay between the loss  
284 of consciousness and the cuff inflation of the tracheal tube to limit the risk of pulmonary  
285 aspiration. To fulfill this objective, induction of anesthesia should be performed using a rapid  
286 sequence induction using short acting anesthetic drugs.<sup>4</sup>

287 To reduce the risk of pulmonary aspiration the rapid sequence induction of anesthesia  
288 comprises the application of the Sellick maneuver.<sup>4</sup> During this maneuver, the esophagus is  
289 manually compressed and thus occluded between the cricoid cartilage and the fifth cervical  
290 vertebra.<sup>5,6</sup> However, the Sellick maneuver described more than 40 years ago, remains  
291 controversial.<sup>7,8</sup> It has not been demonstrated that the esophageal occlusion is complete in all  
292 cases and even that it is an efficacious measure to protect against regurgitation.<sup>9-11</sup> In addition,  
293 this maneuver may even facilitate regurgitation if inappropriately applied,<sup>12,13</sup> and may induce  
294 difficulties in intubating the trachea or compromise mask ventilation.<sup>14-18</sup>

295 Thus, the aim of the study is to assess the interest of the Sellick maneuver during rapid  
296 sequence induction of anesthesia in adults (pregnancy excluded) by comparing the incidence  
297 of pulmonary aspiration whether this maneuver is real or sham.

298

299        **2.2 Literature review and prerequisites**

300        **2.2.1 Pulmonary aspiration and anesthesia**

301        The incidence of anesthesia-induced pulmonary aspiration has been poorly  
302 documented, as well as that of aspiration-induced pneumonia, some of them being not  
303 appropriately diagnosed.<sup>19</sup> Pulmonary aspiration is absent during loco-regional anesthesia  
304 without sedation,<sup>2</sup> but occurs during general anesthesia because of the loss of airway  
305 protective reflexes as consciousness is impaired due to anesthetic agents used. Pulmonary  
306 aspiration occurs mainly during induction of anesthesia but may also occur during anesthesia  
307 recovery. Their incidence and consequences are variables. In a study conducted in 172,334  
308 patients who underwent 215,488 general anesthetics, the incidence was estimated 1/3886  
309 (0.03%) during elective surgery. In emergency surgery, the incidence was reported as 1/885  
310 (0.1%) with a higher incidence in the most severe patients (ASA 4: 1/343; 0.3%).<sup>2</sup> In another  
311 study including 185,385 anesthesia, the incidence of aspiration-related pneumonia was 1/2131  
312 (0.1%) and an emergency condition was noted in half the cases.<sup>3</sup> Moreover, the incidence of  
313 pulmonary aspiration is increased in case of difficult tracheal intubation.<sup>20</sup> The consequences  
314 of pulmonary aspiration are also highly variable.<sup>19</sup> In the Warner et al. study,<sup>2</sup> 2/3 of the  
315 patients had no clinical signs, and 1/3 required prolonged mechanical ventilation. In the  
316 Olsson et al. study,<sup>3</sup> a radiological diagnosis of the pneumonia was performed in 47% of cases  
317 and 17% of patients required prolonged mechanical ventilation. However, several very severe  
318 cases have been reported and the severity of the disease depends on the volume and  
319 characteristic of inhaled gastric content.<sup>19</sup> In a more recent study assessing the complications  
320 observed after 3,423 tracheal intubations performed in emergency conditions in an academic  
321 hospital, the incidence of pulmonary aspiration was 2,8%.<sup>21</sup>

322

323        **2.2.2 Prevention of the risk of aspiration**

324        In a patient with a full stomach or having some regurgitation risk factors, several  
325 techniques are possible to prevent the occurrence of pulmonary aspiration and aspiration-  
326 induced pneumonia:

- 327 - to administer an anti-acid oral drug to diminished the acidity of the gastric content ;
- 328 - to promote gastric emptying either by administering drugs which accelerate gastric  
329 emptying or by aspiration of the gastric content using a nasogastric tube;
- 330 - induction of anesthesia should be performed using a rapid induction sequence which  
331 comprise a careful preoxygenation procedure, the administration of a short-acting  
332 anesthetic drug and a short-acting muscular relaxant, and the Sellick maneuver .<sup>4</sup>

333

334 **2.2.3 The Sellick maneuver**

335 Described more than 40 years ago, the maneuver aims to occlude the esophagus by  
336 manually compressing it between the cricoid cartilage and the 5<sup>th</sup> cervical vertebra.<sup>5</sup> The  
337 initial description was performed in human cadavers and the efficacy of the maneuver was  
338 reported in a short series of 26 patients at high risk of pulmonary aspiration: in 23 patients no  
339 regurgitation of the gastric contents was observed whereas in the remaining 3 patients this  
340 occurred after the release of the cricoid pressure. Although its efficacy has been poorly  
341 documented, the Sellick maneuver has become a recommended procedure. Later, the  
342 maneuver has been described in more details. A pressure between 20 and 40 Newtons should  
343 be applied on the cricoid cartilage, downward,<sup>22</sup> as soon as the consciousness is lost, until  
344 inflation of the cuff of the tracheal tube.<sup>4</sup> The pressure should be released in case of active  
345 vomiting to avoid esophageal rupture.<sup>22-24</sup> The Sellick maneuver is contraindicated in case of  
346 cervical spine trauma,<sup>25</sup> laryngeal trauma, and foreign bodies in the trachea or the  
347 esophagus.<sup>26</sup> Although widely recommended, the Sellick maneuver remains controversial.<sup>8</sup>  
348 Several reasons can explain this controversy:

- 349 - Anatomical studies have shown that the esophagus is not centrally placed between the  
350 cricoid cartilage and the vertebra and thus a complete occlusion cannot be obtained in all  
351 cases during the Sellick maneuver.<sup>9-11</sup>
- 352 - The Sellick maneuver seems to be easy to apply but the pressure level to be used is  
353 difficult to verify and thus this maneuver is not always appropriately performed.<sup>27-31</sup>
- 354 - A too low pressure may facilitate regurgitation because it could induce a release of the  
355 lower esophageal sphincter.<sup>12,13,32,33</sup>
- 356 - Some cases of regurgitation and pulmonary aspiration have been reported despite the  
357 application of the Sellick maneuver.<sup>34-36</sup>
- 358 - The Sellick maneuver may compromise tracheal intubation,<sup>17,18,37-39</sup> insertion of a  
359 laryngeal mask,<sup>14,15,40</sup> and mask ventilation.<sup>41</sup>
- 360 - Lastly, the Sellick maneuver may induce severe complications such as esophageal rupture  
361 or fracture of the cricoid cartilage.<sup>22-24,42-44</sup>

362

363 **2.3 Summary of the known risks and foreseeable risks to the research subjects**

364

365 **2.3.1 Risks associated to anesthesia with rapid sequence induction**

- 366 - Risk of pulmonary aspiration because of fasting noncompliance and/or emergency  
367 conditions in a patient with a full stomach and/or risk of regurgitation as described above.  
368 The pulmonary aspiration risk is estimated between 0.5 and 3 % according to previous  
369 studies. The hypothesis is that the risk of pulmonary aspiration is not increased when the

370 Sellick maneuver is not performed. However, the aim of this study is to demonstrate that  
371 the risk of pulmonary aspiration when the Sellick maneuver is not performed, is not  
372 greater.

373

### 374 **2.3.2 Risk associated with the Sellick maneuver**

375 Risks related to the Sellick maneuver:

- 376 - increased risk of pulmonary aspiration ;
- 377 - difficult laryngeal exposure during tracheal intubation;
- 378 - difficult mask ventilation if required ;
- 379 - risk of cricoid cartilage fracture ;
- 380 - risk of esophageal rupture;

381

382 Risk associated to the sham procedure:

- 383 - Increased risk of pulmonary aspiration ;

384

385

## 386 **3. RESEARCH OBJECTIVES**

### 387 **3.1. Tested hypothesis :**

388 We test the noninferiority hypothesis that the incidence of pulmonary aspiration in  
389 adult patients requiring a rapid induction sequence is not increased when the Sellick maneuver  
390 is not performed (Sham group) as compared to its application (Sellick group).

391

### 392 **3.2. Primary objective :**

393 The primary end point is to demonstrate that the incidence of pulmonary aspiration is  
394 not increased when the Sellick maneuver is not performed during a rapid induction sequence.  
395 Pulmonary aspiration is detected in the operating room just after tracheal intubation either at  
396 the glottis level during laryngoscopy or by tracheal aspiration just after tracheal intubation.

397

### 398 **3.3. Secondary objectives :**

- 399 - Laryngeal exposure during tracheal intubation assessed using Cormack and Lehane  
400 grade.<sup>45</sup>
- 401 - Difficult tracheal intubation as defined by the SFAR Consensus : tracheal intubation  
402 requiring more than 2 attempts and/or requiring an alternative technique (despite  
403 optimization of the head position and external laryngeal manipulation).<sup>46</sup>

- 404 - Impossible tracheal intubation impossible defined par intubation failure requiring  
405 awakening of the patients after use of alternative techniques and/or requiring  
406 cricothyroidomy or tracheotomy.
- 407 - Mask ventilation requirement.
- 408 - Interruption of the Sellick maneuver as requested by the tracheal intubation operator ;
- 409 - Consequences of Sellick maneuver interruption assessed by the Cormack and Lehane  
410 grade.
- 411 - Traumatic complications related to the Sellick maneuver : esophageal rupture and cricoid  
412 cartilage fracture. Because these complications are rare and highly symptomatic, no  
413 specific examination is required.
- 414 - Incidence of aspiration pneumonia within the first 24h. The diagnosis is retained when  
415 pulmonary aspiration is observed in the operating room and new radiological infiltrates is  
416 observed.<sup>2</sup> A chest X-ray is performed in the recovery room only in case of : 1)  
417 pulmonary aspiration observed in the operating room (cf. above), 2) any clinical sign  
418 enabling to suspect aspiration pneumonia. A new Chest-X ray should be performed at 24  
419 hours in the previous cited cases even if the initial chest X ray is normal. Aspiration  
420 pneumonia is considered as severe when at least one of the following item is present : 1)  
421 decrease in oxygen saturation when breathing room air greater than 10% compared to the  
422 value before anesthesia; 2) PaO<sub>2</sub>/FiO<sub>2</sub> less than 300;<sup>2</sup> 3) requirement of mechanical  
423 ventilation (invasive or not) and 4) prolonged hospital duration.
- 424 - Mortality at Day 28 or at hospital discharge if it occurs before Day 28. It seems  
425 reasonable to capture all mortality events when pulmonary aspiration occurs (primary end  
426 point).
- 427

## 428 **4. RESEARCH DESIGN**

### 429 **4.1. Type of the study**

430 This is a multicenter, randomized, double-blind, noninferiority study comparing a  
431 group of patients requiring anesthesia and a rapid induction sequence without the Sellick  
432 maneuver (Sham group) with a group of patients requiring anesthesia and a rapid induction  
433 sequence with a Sellick maneuver (Sellick group).

434

435  
436  
437

**4.2. Precise statement of the primary end point and, where applicable, secondary end points.**

438  
439  
440  
441  
442

**4.2.1. Primary end point**

The primary end point is the presence or absence of bronchial inhalation diagnosed in the operating room with the presence of gastric fluid in the vocal cords or in the tracheal aspiration immediately after intubation.

443

**4.2.2. Secondary end point**

444  
445  
446  
447  
448  
449  
450  
451  
452  
453  
454  
455  
456  
457  
458

- Cormack and Lehane grade (Appendix 1)
- Number of difficult tracheal intubations
- Number of impossible tracheal intubations
- Number of oxygen desaturations (< 92%)
- Number of face mask ventilations required
- The need to interrupt the Sellick maneuver in both arms of the study and the reasons for the interruption.\*
- Effects of the Sellick maneuver release on tracheal intubation conditions assessed by the Cormack and Lehane grade
- Morbidity related to the application of the Sellick maneuver in the Sellick group. This is evaluated by looking for known complications of the maneuver such as an esophageal rupture occurring during vomiting efforts or a fracture of the cricoid cartilage.
- Incidence of inhalation pneumonia within H24.
- Mortality on Day 28 or on discharge from hospital if prior to Day 28.

459  
460

**4.3. Description of the research methodology, including a schematic presentation specifying the planned visits and examinations.**

461  
462

**4.3.1. Patient follow-up**

463

**4.3.1.1. Checking inclusion and non-inclusion criteria**

464  
465  
466  
467  
468  
469

During the pre-anesthetic evaluation of patients, the anesthetic strategy is decided. Also, inclusion and non-inclusion criteria are verified at this stage. This pre-anesthetic evaluation will be carried out as part of the emergency department on the day of surgery. In other situations, verification of inclusion criteria will be done during the anesthesia consultation at least 48 hours prior to surgery.

470

471

#### ***4.3.1.2. Information and informed consent of the patients***

472

Information and informed consent is collected before inclusion.

473

474

Within the framework of scheduled surgery, in the presence of a regurgitation risk factor, recognized during an anesthesia consultation (at least 48 hours before the surgery), the information is delivered and written informed consent is obtained during this same consultation or during the pre-anesthetic visit carried out the day before the operation.

477

478

479

480

481

482

483

484

485

486

487

As part of an emergency procedure, information is provided and informed consent is obtained during the pre-anesthetic evaluation on the day of surgery. If the patient is unable to sign the consent, the explanation of the study and collection of the consent of a relative, family member or designated trustworthy person is done. In this case, consent is obtained from the patient, after being informed as soon as the patient's state of health permits. An emergency inclusion procedure may be performed by the investigating physician in charge of the patient, after consultation with an independent physician. In this case, as soon as a family member, relative or designated trusted person has been contacted, the information is issued and consent is requested. As soon as possible, the patient is informed and his/her written informed consent is obtained for the eventual continuation of the research.

488

#### ***4.3.1.3. Follow -up***

489

Any randomized patient is evaluated up to Day 28 or until discharge from the hospital if prior to Day 28.

491

492

### **4.4 Description of the measures taken to reduce and avoid bias, including in particular :**

493

494

#### ***4.4.1. Recruitment***

495

496

497

498

499

500

501

502

503

504

505

This study is aimed to include as much as possible all eligible patients to guaranty that the included population actually reflects the population requiring rapid induction sequence. The inclusion criteria are simple and the exclusion criteria only comprised rare contraindications of the Sellick maneuver or the rapid induction sequence (cf above) and preexisting pneumonia of consciousness abnormalities which may make the primary end point difficult to assess. Patients will be recruited in 10 academic centers (Department of anesthesiology and critical care, Groupe Hospitalier Pitié - Salpêtrière – Paris, Department of anesthesiology and critical care, Hôpital Beaujon – Clichy, Department of anesthesiology and critical care, hôpital Bicêtre – Le Kremlin Bicêtre, Department of anesthesiology, hôpital Avicenne – Bobigny, Department of anesthesiology and critical care, Hôpital Bichat - Paris, Department of anesthesiology, CHU de Rouen – Rouen, Department of anesthesiology and

506 critical care, CHU d' Amiens – Amiens, Department of anesthesiology and critical care, CHU  
507 de Bordeaux – Bordeaux, Department of anesthesiology and critical care, CHRU de Lille –  
508 Lille, Department of anesthesiology and critical care, CHU de Nîmes – Nîmes, all in France)  
509 and each center will participate according to its inclusion capabilities reported in table 1.

510  
511

#### ***4.4.2. Randomization***

512 It will be a centralized randomization (Randoweb®) managed by the URC Pitié-  
513 Salpêtrière. Each investigator will be able to access the randomization site using a personal  
514 password. The randomization arms are the following: effective application (Sellick group) or  
515 feinting of the Sellick maneuver (Sham group). This randomization is carried out on the day  
516 of surgery before entering the operating room. The randomization list will be generated by  
517 blocks in a 1:1 ratio and will be stratified by center. Within each block, the number of patients  
518 in Sham group will be equal to the number of patients in the Sellick group. The size of the  
519 blocks will be defined by the person in charge of randomization, and will only be  
520 communicated to the DRCD Quality Assurance department.

521  
522  
523

#### ***4.4.3. Blinding methods***

524 In order to carry out this double-blind study, in the experimental group, the Sellick  
525 maneuver is simulated so that the person performing the orotracheal intubation does not know  
526 which arm the patient is in.

527

### **4.5. Research participation and total expected research time**

529 Each patient's participation period is a maximum of 28 days. The inclusion period is  
530 24 months, so the study is planned to last 25 months.

531



532

533

#### 4.6. Summary table of the chronology of the research and examinations

534

#### conducted

535

In case of scheduled surgery:

536

|                                                        | Pre-anesthesia<br>consultation<br>At least 48h before | Pre-anesthesia visit<br>day of surgery | Day 0<br>= Day of surgery | Day 1 | Day 2 to Day 28 |
|--------------------------------------------------------|-------------------------------------------------------|----------------------------------------|---------------------------|-------|-----------------|
| Protocol presentation                                  | X                                                     | X                                      |                           |       |                 |
| Submission of the information<br>note and consent form | X                                                     | X                                      |                           |       |                 |
| Inclusion and exclusion criteria<br>verification       | X                                                     |                                        |                           |       |                 |
| Signature of consent form                              | X                                                     | X                                      |                           |       |                 |
| Past medical history                                   | X                                                     |                                        |                           |       |                 |
| Clinical examination                                   | X                                                     |                                        |                           |       |                 |
| Randomization                                          |                                                       |                                        | X                         |       |                 |
| Rapid sequence induction                               |                                                       |                                        | X                         |       |                 |
| Bacteriological sampling                               |                                                       |                                        | (x)                       | (x)   |                 |
| Chest X-ray                                            |                                                       |                                        | (x)                       | (x)   |                 |
| Adverse and serious adverse<br>events recording        |                                                       |                                        | X                         | x     | x               |

537

538 *X : performed according to routine care*

539 *(x) : if necessary*

540

541

542

543 In case of emergency surgery :  
544

|                                                        | Day 0 = Pre-anesthesia<br>visit = Day of surgery | Day 1 | Day 2 to<br>Day 28 |
|--------------------------------------------------------|--------------------------------------------------|-------|--------------------|
| Protocol presentation                                  | X                                                |       |                    |
| Submission of the information<br>note and consent form | X                                                |       |                    |
| Inclusion and exclusion criteria<br>verification       | X                                                |       |                    |
| Signature of consent form                              | X                                                |       |                    |
| Past medical history                                   | X                                                |       |                    |
| Clinical examination                                   | X                                                |       |                    |
| Randomization                                          | X                                                |       |                    |
| Rapid sequence induction                               | X                                                |       |                    |
| Bacteriological sampling                               | (x)                                              | (x)   |                    |
| Chest X-ray                                            | (x)                                              | (x)   |                    |
| Adverse and serious adverse<br>events recording        | X                                                | x     | x                  |

545  
546 *X : performed according to routine care*  
547 *(x) : if necessary*  
548

#### 549 **4.7. Description of final or temporary stop rules**

550 The decision to discontinue the study will be taken by the Independent Monitoring  
551 Committee. The convening of an extraordinary meeting may take place at the request of the  
552 principal investigator or methodologist, in the event of serious adverse events or results that  
553 might call into question the existence of the protocol.

554 The following will also be considered grounds for discontinuing the study:  
555

##### 556 **4.7.1. In case of insufficient recruitment:**

557 a) if one year after the official research start date, no inclusion has been made, the DRCD will  
558 decide on the premature termination of the research.

559 b) if at 30% of the time allowed for inclusion of subjects in the study, fixed from the date of  
560 the first inclusion, less than 15% of the subjects have been included, an analysis of the causes  
561 will be carried out and corrective actions taken (motivation of the centers, addition of  
562 additional centers, modification of the criteria on the population to be included).

563 c) lastly, if less than 30% of the patients have been included, at 50% of the expected duration  
564 of the inclusions defined as above, the DRCD is likely to decide, after obtaining the assent of

565 the independent Supervisory Committee, whether the inclusions should be definitively  
566 discontinued, or even whether the research should be terminated prematurely.

567

#### 568 **4.7.2. In the event of serious adverse events in excess.**

569 The study will be interrupted if the serious adverse events (SAE) are doubled.

570

#### 571 **4.7.3. Other specifically monitored events**

572 The study may be interrupted in the event of a doubling of these specific events. The  
573 increase in the number of severe pneumonia, *i. e.* requiring mechanical ventilation or  
574 lengthening the length of hospitalization, increased incidence of impossible intubation and  
575 excess mortality at Day 28 or upon discharge from hospital, will be criteria for premature  
576 discontinuation of the study.

577

578

## 579 **5. INCLUSION AND EXCLUSION OF PATIENTS**

### 580 **5.1. Criteria for inclusion of patients**

581 1. All adult patients requiring emergency general anesthesia or presenting regurgitation  
582 risk factors, for whom a rapid sequence induction should be performed.

583 2. Obtaining the consent of the patient or a trusted person/family member. In an  
584 emergency situation and in the absence of a close relative/trustworthy person, the patient  
585 may be randomized on the advice of an independent physician. Consent to continue the  
586 research will be sought as soon as the patient's condition permits.

### 587 **5.2 Criteria for non inclusion of patients**

588 1. Patients under 18 years of age

589 2. Pregnant women (interrogation diagnosis)

590 3. Patients with contraindications to the Sellick maneuver:

591 - spinal cord injury - cervical spinal cord injury;

592 - laryngeal trauma ;

593 - intra-tracheal foreign body ;

594 - esophageal foreign body ;

- 595 4. Patients with contraindications to succinylcholine:
- 596 - hyperkalemia or risk of hyperkalemia;
- 597 - allergy;
- 598 -previous history of malignant hyperthermia;
- 599 - myopathy;
- 600 - extensive burns > 24 hours;
- 601 - paraplegia/tetraplegia/denervation > 24h;
- 602 - plasma pseudocholinesterase deficiency;
- 603 - injury to the eye.
- 604 5. Patients with signs suggestive of pneumonia during preanesthetic evaluation
- 605 6. Patients with severe pulmonary contusion
- 606 7. Patients with upper airway morphological abnormalities
- 607 8. Patients requiring an alternative technique to direct laryngoscopy.
- 608 9. Patient with consciousness disorders
- 609 10. Decision to use a disposable plastic laryngoscope blade
- 610 11. Decision to use rocuronium
- 611 12. Patient not affiliated the national health care insurance (beneficiary or entitled).
- 612

## 613 **6. TREATMENT OF PATIENTS INCLUDED IN THE STUDY**

614 Patients requiring general anesthesia in the emergency room –except those with  
615 expected difficult tracheal intubation- benefit from an anesthesia protocol that meets the  
616 recommendations for Good Clinical Practice.<sup>4</sup> Neutralization of gastric acidity can be  
617 achieved by taking effervescent cimetidine 20 minutes prior to induction, left to the discretion  
618 of the anesthesiologist. After careful pre-oxygenation (4 vital capacities in case of emergency  
619 conditions or until an expired oxygen fraction (FeO<sub>2</sub>) > 90% is obtained), induction of  
620 anesthesia is achieved by intravenous administration of a fast-acting hypnotic adapted to the

621 patient's hemodynamic state (propofol (1.5 to 2.5 mg/kg), thiopental (3 to 5 mg/kg), etomidate  
622 (0.2 to 0.4 mg/kg), ketamine (2 to 3 mg/kg) and a muscle relaxant with short duration of  
623 action: succinylcholine at the dosage of 1 mg/kg. Tracheal intubation is then performed using  
624 a MacIntosh laryngoscope with metallic blade.<sup>47</sup> The correct position of the tracheal tube is  
625 confirmed by the presence of a capnogram (3 cycles). The Sellick maneuver is maintained  
626 from loss of consciousness until the balloon of the tracheal tube is inflated and the correct  
627 intratracheal position has been verified. The efficacy of the Sellick maneuver to prevent  
628 pulmonary aspiration being the primary end point, patient groups differ only in the actual or  
629 feigned performance of the maneuver.

630

### 631 **6.1. Control group : the Sellick maneuver**

632 Thus, in the Sellick arm of the study, the Sellick maneuver is applied, as initially described  
633 by Sellick et al.<sup>5</sup> To do so, after having identified the cricoid cartilage, the operator exerts a  
634 pressure equivalent to 30 Newtons (~3 kg) with the first 3 fingers of his dominant hand. The  
635 pressure is applied using the thumb and middle finger, positioned at 10 and 2 o' clock  
636 respectively. The index finger is positioned on the cricoid cartilage to control the direction of  
637 compression. The Sellick maneuver is taught to all anesthesiologists in training and performed  
638 daily. However, specific training to carry out the Sellick maneuver is planned before the  
639 inclusion of the first patient in each center. This training will include a manikin to clarify the  
640 position of the operator's fingers and a pressure training session according to an ergonomic,  
641 reproducible model: the obstructed syringe model described by Flucker et al.<sup>48</sup> This model  
642 reproduces the 10 and 30 Newton pressures recommended in the Sellick maneuver by  
643 reducing the piston of a 50 ml syringe filled with air and blocked to 40 and 33 ml  
644 respectively. This training will be repeated on a monthly basis throughout the study.

645

### 646 **6.2. Experimental group : The feigned Sellick maneuver**

647 In the experimental arm, the Sellick maneuver is feigned; the operator who has to perform  
648 it is the only one who knows which arm of the study the patient is in. Thus, he/she positions  
649 his/her fingers as described in the Sellick arm (see above) without exerting pressure on the  
650 cricoid cartilage.

651 In both arms, the Sellick maneuver, whether actual or feigned, can be released at the request  
652 of the person performing tracheal intubation, particularly to improve intubation conditions or  
653 in case of active vomiting. On the other hand, it must be maintained if ventilation with the  
654 face mask is required.

655

656 **6.3. Induction of anesthesia**

657 The induction of anesthesia is carried out by at least two individuals, one of them  
658 performing the Sellick maneuver, whether actual or feigned. In order to maintain the blind  
659 person regardless of intubation conditions, the person performing the Sellick maneuver,  
660 whether feigned or actual, will not be able to replace the operator in case of difficult tracheal  
661 intubation, so it is not possible to interchange the functions of the person who intubates and  
662 the person performing the Sellick maneuver.

663 In order to optimize the tracheal intubation conditions of patients, student anesthesia  
664 nurses and anesthesia fellow with less than one year of seniority will not be able to intubate  
665 patients participating in the study. However, they will be able to perform the Sellick  
666 manoeuver after training, as described above.

667 Sellick's manoeuver can only be carried out by medical or paramedical personnel  
668 trained in anesthesia (nurse anesthetist, student nurse anesthetist, senior anesthesiologist,  
669 junior anesthesiologist).

670 If the patient is carrying a nasogastric tube, after suctioning the stomach contents, the  
671 nasogastric tube is removed or left in place during induction, depending on the choice of the  
672 operator.

673 The methods of induction of anesthesia meet the requirements of induction in rapid  
674 sequence. The choice of hypnotic agent is left to the anesthesiologist. The muscle relaxant  
675 used for induction is succinylcholine at the dosage of 1 mg/kg. Anesthesia is induced after  
676 pre-oxygenation using a facial mask, using a fraction inhaled in 100% oxygen to obtain an  
677 exhaled oxygen fraction greater than 90%. The Sellick maneuver, whether effective or  
678 feigned, is released in the event of active vomiting or difficulty in exposing the glottis.

679 The Sellick maneuver, whether effective or feigned, is maintained in case of the need  
680 for facial mask ventilation unless ventilation is also difficult and potentially hampered by  
681 cricoid compression.

682

683 **6.4. Data collection**

684 All data of patients meeting the inclusion criteria and hospitalized during the study, are  
685 collected anonymously. For eligible patients not included in the study, the reason for non-  
686 inclusion is recorded.

687 Data on patients included in the study are collected by investigators and clinical research  
688 technicians under the supervision of a clinical research associate on paper observation  
689 books. Each notebook contains the center number, the inclusion number and the patient's  
690 initials.

691 Any randomized patient is evaluated up to Day 28 or until discharge from the hospital if  
692 prior to Day 28. Data are collected anonymously.

693 Demographic data (sex, age and type of surgery), as well as morphological data (size,  
694 weight), the duration of the preoperative fasting period, elements that increase the risk of  
695 regurgitation (gastroparesis, gastroesophageal reflux disease, hiatal hernia, previous gastric  
696 surgery, functional or organic ileus, nausea, vomiting, obesity, pain), variables relevant to  
697 airway management (Mallampati score (see Appendix 3), mouth opening and thyromental  
698 distances, dentition, macroglossia, prior difficult tracheal intubation, cervical spine  
699 mobility, retrognathia) are indicated from the preanesthetic consultation file. The other data  
700 are reported in the operating room, recovery room and hospital ward.

701 Pulmonary aspiration as well as procedural complications are listed in the operating  
702 room, aspiration pneumonias are collected up to the 24th hour. Overall mortality (all  
703 causes combined) is estimated at Day 28 or on discharge from the hospital if prior to  
704 Day28.

705 **In the operating room:**

706 Data concerning the conduct of anesthesia:

707 - drug used for anesthetic induction (hypnotic, opioid, curare): type, dosage, mode of  
708 administration.

709 Data concerning possible inhalation;

710 - observation during the procedure of regurgitation with gastric content in the vocal cords;

711 - detection of gastric content in the tracheal aspiration immediately after intubation of the  
712 trachea;

713 - data concerning the realization of Sellick maneuver, whether actual or feigned;

714 - quality of the operator performing the Sellick manoeuvre;

- 715 - the need to interrupt the Sellick maneuver due to active vomiting;
- 716 - the need to interrupt Sellick maneuver because of difficulties in exposing the glottis;
- 717 - effect of Sellick maneuver release on tracheal intubation conditions (Cormack and  
718 Lehane grade);
- 719 - upper airway management data ;
- 720 - quality of the tracheal intubation operator;
- 721 - duration of the procedure to intubate the trachea (delay between the insertion of the  
722 laryngoscope blade and verified intubation of the trachea, i. e. inflation of the balloon of  
723 the tracheal tube and presence of 3 capnograms).
- 724 - Cormack and Lehane grade;
- 725 - oxygen desaturation (SpO2 < 92%) ;
- 726 - duration of oxygen desaturation ;
- 727 - necessity of face mask ventilation;
- 728 - traumatic complications (dental damage, bleeding).

729

730 **In the recovery room:**

- 731 - traumatic complications related to the execution of the Sellick maneuver
- 732 - Chest X-ray in case of suspected pulmonary aspiration

733

734 **In the hospital ward:**

- 735 - search for early pneumonia up to 24 hours.
- 736 - chest X-ray in case of suspected pulmonary aspiration bronchial inhalation if the X-ray  
737 performed in the recovery room is normal.

738

739 **Status at Day 28 or at discharge from hospital if prior to Day 28**

- 740 - Status: living or deceased: the date of death will be collected if applicable

741

742

743 **7. SAFETY EVALUATION**

744 **7.1. Description of safety evaluation parameters**

- 745 • **Adverse event**



746 Any harmful manifestation occurring in a person who is suitable for biomedical research,  
747 whether or not this manifestation is related to any experimental element of the research and  
748 whether or not it is related to the acts performed or the products used.

749

750 • **Adverse effect**

751 Any harmful and unwanted reaction to any experimental element of the research and what is  
752 being done or products used.

753

754 • **Serious adverse event or effect**

755 Any adverse event or effect that results in death, endangers the life of the person being  
756 searched for, requires hospitalization or prolonged hospitalization, results in significant or  
757 lasting disability or incapacity, or results in birth defects or birth defects.

758

759 • **Unexpected adverse effect**

760 Any undesirable effect whose nature, severity or evolution does not agree with the  
761 information contained in the standards recognized by the authorities.

762

763

764 • **New Facts**

765 Any new safety data, which may lead to a reassessment of the report on the benefits and  
766 risks of the research or which may be sufficient to consider changes in the documents  
767 relating to the research, the conduct of the research and, where appropriate, in the use of the  
768 product.

769

770 **7.2. Methods and timetables for measuring, collecting and analysing safety evaluation**  
771 **parameters**

772 **7.2.1. Steering committee**

773 **Role:**

774 It will be composed of the principal investigators of the project, the biostatistician in charge of  
775 the project, representatives of the promoter and the URC nominated for this research. It will  
776 define the general organization and conduct of the research and coordinate the information. It  
777 will initially determine the methodology and decide during the course of research on what to  
778 do in unforeseen cases, monitor the progress of the research, particularly with regard to  
779 tolerance and adverse events

780

781 **Composition:**

782 It will be made up of the main investigators of the project (Aurélié Birenbaum, François  
783 Lenfant, Olivier Langeron, Bruno Riou), the methodologist in charge of the project  
784 representing the URC (Marie Laure Tanguy), and a member of the Ile de France Clinical  
785 Research Delegation (DRCD) nominated for this trial.

786

787 **7.2.2 Independent oversight committee**

788 Nil

789

790 **7.2.3 Independent Committee for the Evaluation of Critical Events**

791 **Roles**

792 The committee will:

- 793 - validate, independently of the investigators and in a homogeneous manner, without  
794 knowing the treatments administered or the procedure followed, the clinical, biological,  
795 endoscopic, ultrasound, anatomopathological, etc... evaluation criteria necessary to  
796 validate the primary end point and

797

798 - have an advisory and decision-making function when the sponsor engages the sponsor on  
799 medical issues such as tolerance and adverse events. It may decide to discontinue the  
800 study if a serious adverse event occurs.

801

## 802 **Composition**

803 This committee will be composed of external experts, including at least one methodologist  
804 or biostatistician. We propose Prof. Paul Landais (biostatistician, CHU Carrémeau, Nîmes,  
805 France), Prof. Alexandre Duguet (pulmonologist and intensivist, Hôpital Pitié Salpêtrière,  
806 Paris, France), Dr. Bernard Vigué (anesthesiologist, Hôpital Bicêtre, Kremlin Bicêtre,  
807 France).

808

## 809 **7.3. Procedures for registration and reporting adverse events**

### 810 **7.3.1. Non severe adverse events (AE):**

811 Any undesirable events - not serious as defined above - observed during the research and  
812 its aftermath should be reported in the observation book in the section provided for this  
813 purpose.

814 Only one event must be reported per item. The event may correspond to a symptom,  
815 diagnosis or additional test result deemed significant. All clinical or para-clinical elements  
816 that best describe the corresponding event must be reported.

817

### 818 **7.3.2. Serious adverse events (SAE) :**

819 The research-validated SAE reporting form is included in the annexed protocol. The  
820 same applies to the classification grid for serious and non-severe AE. This grid has been  
821 developed to assist the investigator in managing AE (*i. e.*, to help the investigator differentiate  
822 between events according to their severity and expected nature). The grid is elaborated and  
823 validated by all the actors involved in the research (*i. e.*: the Head of the Clinical Research  
824 Unit, the Principal Investigator of the research, the Project Manager of the study, the Medical  
825 Coordinator of the DRCD and the Head of Pharmacovigilance of the DRCD). It may evolve  
826 as the research progresses, depending on the statements received by the sponsor.

827 The investigator is required to immediately notify the sponsor AP-HP (Assistance  
828 Publique-Hôpitaux de Paris) of all serious adverse events except those identified in the  
829 schedule as not requiring immediate notification.

830 The investigator completes the SAE report form (from the research observation book)  
831 and sends it to the DRCD by fax to 01 44 84 17 99 within 48 hours (after an immediate  
832 telephone call to 01 44 84 17 23 in the event of death or life-threatening threats, if possible).

833 For each SAE, the investigator will have to give an opinion on the causal link between  
834 the event and any experimental element of the research, whether the acts performed or the  
835 products used.

836 Obtaining information relating to the description and assessment of an AE may not be  
837 possible within the time limit for initial reporting.

838 Also, the clinical progress as well as the results of any clinical assessments, diagnostic  
839 and/or laboratory examinations, or any other information allowing an adequate analysis of the  
840 causal link will be reported:

- 841 - on the initial SAE declaration if they are immediately available ;
- 842 - at a later date and as soon as possible, by faxing a new completed SAE declaration (and  
843 indicating that it is a declared SAE tracking and the tracking number).

844 All statements made by investigators must identify each subject participating in the  
845 research by a unique code number assigned to each subject.

846 In the event of a notified death of a subject participating in the research, the  
847 investigator will provide the sponsor with all additional information requested (hospitalization  
848 report, autopsy results, etc.).

849 Any new developments in the research or in the context of the research, arising from  
850 literature data or ongoing research, should be notified to the sponsor.

851

## 852 **Reporting of serious adverse events to health authorities**

853 This will be carried out by the DRCD's Pharmacovigilance Centre, after evaluation of  
854 the seriousness of the AE, the causal link with the experimental element of the research,  
855 whether the acts performed or the products used, and the unexpected nature of the adverse  
856 effects. All suspected serious unexpected SAE will be reported by the sponsor to the  
857 competent authorities within the legal timeframe.

858 Any safety data or new developments which could significantly modify the assessment  
859 of the benefits and risks of the experimental element of the research (and whether they  
860 concern acts performed or products used) or the research, or which could lead to changes in  
861 the conduct of the research, will be transmitted by the sponsor to the competent authorities,  
862 the Committee for the Protection of Individuals and the investigators of the research.

863 Like, for example:

864 (a) any clinically significant increase in the frequency of onset of an expected serious  
865 adverse reaction;

866 b) suspected unexpected SAE in participants who have completed the trial and are  
867 reported by the investigator to the sponsor, as well as any follow-up reports;

868 (c) any new developments concerning the conduct of the clinical trial, where such  
869 developments are likely to affect the safety of the participants. For example: a SAE that is  
870 likely to be related to the investigation and diagnostic procedures of the trial and that could  
871 affect the conduct of the trial, a significant risk for the trial population, such as a lack of  
872 efficacy of the experimental element used to treat a life-threatening disease, significant safety  
873 results from a recently completed animal study (such as a carcinogenicity study), early  
874 stopping or temporary interruption for safety reasons.

875

#### 876 **7.4. Modalities and duration of follow-up of individuals patients following the** 877 **occurrence of an adverse event**

878 Any patient with an AE should be monitored until it is resolved or stabilized. If the event is  
879 not serious, the evolution will be noted on the corresponding page of the observation book  
880 in the section provided for this purpose. If the event is serious, a follow-up SAE will be  
881 sent to the DRCD.

882

### 883 **8. STATISTICAL ANALYSIS**

884 The statistical analyses will be carried out under the responsibility of the biostatistics and data  
885 management division of the URC Pitié-Salpêtrière-Charles-Foix using SAS 9.2 software  
886 (SAS Institute, Cary, NC).

887

#### 888 **8.1. Description of statistical methods envisaged, comprising timetable of planned** 889 **interim analysis.**

##### 890 **8.1.1. Descriptive analyses**

891 Patient characteristics will be described in each of the two groups. Quantitative  
892 variables will be described by their mean, standard deviation, median and interquartile range.  
893 Qualitative variables will be described by frequency and percentage.

894

##### 895 **8.1.2. Analysis of the primary end point**

896 The objective is to demonstrate the noninferiority of the group in which the Sellick  
897 maneuver is feigned (sham) on the incidence of pulmonary aspiration. We will take a  
898 noninferiority margin equal to 50% of the incidence observed in the group with effective  
899 Sellick maneuver (Sellick group).

900 The Wald method will estimate a 95% one-sided confidence interval for the excess  
901 risk induced by the absence of Sellick maneuver (Sham group). If the limit of the interval is

902 less than 50% of the incidence of pulmonary aspiration in the Sellick group, then the  
903 noninferiority of the Sham group will be validated.

904

### 905 **8.1.3. Analysis of secondary end points**

906 The conditions of tracheal intubation, characterized by the Cormack and Lehane  
907 grade, will be compared between the Sham group and the Sellick group by Student's t test.  
908 The rate of face mask ventilation will be compared using the Chi-square test.

909 A Chi-square test will also be used to compare morbidity, defined by the occurrence of  
910 the following complications: esophageal rupture occurring during vomiting efforts or a  
911 fracture of the cricoid cartilage. Similarly, the incidence of H24 pneumonia, the number of  
912 difficult tracheal intubations, the number of impossible tracheal intubations and mortality at  
913 Day 28 or at hospital discharge occurs prior to Day 28, will be compared.

914 Multivariate models (mixed linear models or mixed logistic models depending on the  
915 type of variable) will be implemented in order to adjust the effect of the treatment group on  
916 clinical characteristics to inclusion (age, sex, etc.) and the center. Characteristics at inclusion  
917 will be analyzed as fixed effects, while the center will be considered a random effect.  
918

## 919 **8.2. Sample size estimation**

920 The objective of the study is to demonstrate that if the Sellick maneuver is not performed  
921 (Sham group), the number of pulmonary aspirations will not be increased by 50%. It is  
922 estimated that the rate of pulmonary aspiration will be 2.8% in each of the two groups.  
923 Therefore, the objective will be to have a 95% unilateral confidence interval for excess risk  
924 (*i.e.* the difference between pulmonary aspiration rates) of which the limit will not exceed  
925 +0.014. With this assumption, and to obtain a power of 80%, then 1717 patients per group  
926 should be included (nQuery Advisor 7.0). This corresponds to a total of 3434 patients; for  
927 convenience, it was decided to recruit 3500 patients. The choice of  $t = 50\%$  is based on the  
928 low incidence of pulmonary aspiration and on the acceptability of increasing the incidence of  
929 pulmonary aspiration to 4.2% in the Sham group if at the same time, tracheal intubation  
930 conditions are improved in the absence of effective Sellick maneuver. Difficult intubation in  
931 emergency situations is itself a risk of pulmonary aspiration, due to the prolongation of the  
932 procedure (increased time for airway protection) and the need for ventilation in the event of  
933 desaturation in patients with a full stomach. In addition, difficult tracheal intubation in  
934 emergency conditions may be associated with a risk of difficult ventilation in patients in  
935 whom facial mask ventilation could not be tested prior to injection of curare, due to the risk of  
936 pulmonary aspiration, with a major hypoxemic risk.

937

938 **8.3. Expected number of patients in each research location with statistical**  
939 **justification.**

940 The incidence of pulmonary aspiration during emergency intubation varies between 0.5%  
941 and 3% depending on the studies. A sample size of 3500 patients over 25 months is needed  
942 and therefore justifies this study being carried out in several centers. The recruitment  
943 capacities of the 10 investigative centers are sufficient to answer the question asked. (Table 1)  
944 In fact, considering that only 25% of eligible patients will actually be included, over a period  
945 of 2 years in the 10 research centers, the expected number of 3500 patients is largely reached.

946

947 **Table 1:** Estimated number of eligible patients and number of patients included expected.

| INVESTIGATION CENTERS    | NUMBER OF ELIGIBLE PATIENTS/ YEAR | EXPECTED NUMBER OF INCLUDED PATIENTS (25%) /YEAR | EXPECTED NUMBER OF INCLUDED PATIENTS OVER 2 YEARS |
|--------------------------|-----------------------------------|--------------------------------------------------|---------------------------------------------------|
| <b>Amiens</b>            | 1800                              | 450                                              | 900                                               |
| <b>Avicenne</b>          | 1440                              | 360                                              | 720                                               |
| <b>Bichat</b>            | 1200                              | 300                                              | 600                                               |
| <b>Beaujon</b>           | 1800                              | 450                                              | 900                                               |
| <b>Bicêtre</b>           | 1200                              | 300                                              | 600                                               |
| <b>Bordeaux</b>          | 400                               | 100                                              | 200                                               |
| <b>Lille</b>             | 1000                              | 250                                              | 500                                               |
| <b>Nîmes</b>             | 1500                              | 375                                              | 750                                               |
| <b>Pitié-Salpêtrière</b> | 1600                              | 400                                              | 800                                               |
| <b>Rouen</b>             | 750                               | 187                                              | 374                                               |
| <b>TOTAL</b>             | 12690                             | 3172                                             | <b>6344</b>                                       |

948

949 **8.4. Level of statistical significance expected**

950 The noninferiority tests will be unilateral at the 5% level, the comparison tests will be  
951 bilateral at the 5% level.

952

953 **8.5. Statistical criteria for stopping the research (to be described according to the**  
954 **medical context of the research).**

955  
956 Not applicable, no interim analysis is scheduled.

957

958 **8.6. Method of accounting for missing, unused or invalid data.**

959 For the primary end point, missing values for the primary end point should be rare given  
960 the short duration of follow-up. Nevertheless, the most unfavorable value is expected to be  
961 attributed to the noninferiority of the Sham group (*i.e.* pulmonary aspiration in the Sham  
962 group, absence of inhalation in the Sellick group, maximum bias hypothesis).

963 For categorical secondary end points, the missing data will be imputed by the most  
964 unfavorable value to the effect of the Sham group (maximum bias). For the quantitative  
965 secondary end points, the missing data will be imputed to the mean value of the opposite  
966 group, in order to reduce the alpha risk.

967

968 **8.7. Management of changes to the original strategy analysis plan.**

969 Any changes in the analytical strategy will be amended.

970

971 **8.8. Choice of patients included in the analyses**

972 The noninferiority analysis will be performed with the intention of treating for the Sham  
973 group and per protocol in the Sellick group, to ensure that the Sellick maneuver was correctly  
974 performed in this group. Comparison of the secondary end points will be performed in an  
975 intention-to-treat analysis.

976

977 **9. RIGHT OF ACCESS TO SOURCE DATA AND DOCUMENTS**

978

979 Persons having direct access, in accordance with the laws and regulations, in particular  
980 articles L. 1121-3 and R. 5121-13 of the French public health code (e. g. investigators, quality  
981 control officers, monitors, clinical research assistants, auditors and any persons involved in  
982 trials) shall take all necessary precautions to ensure the confidentiality of information relating  
983 to investigational medicinal products, trials, persons who are suitable for testing and, in  
984 particular, their identity and the results obtained. The data collected by these persons during  
985 quality controls or audits are then made anonymous.

986



987 **10. QUALITY CONTROL**

988 The research will be supervised according to the standard operating procedures of the  
989 sponsor. The conduct of the research in the investigation centers and the handling of the  
990 subjects will be carried out in accordance with the Helsinki Declaration and Good Clinical  
991 Practices.

992

993 **10.1 Monitoring procedures**

994 This research presents a C risk with a high level of monitoring. Clinical research assistant  
995 (CRA) representing the sponsor will conduct visits to the investigative centers at the timing  
996 that corresponds to the patient monitoring scheme, the inclusions in the various centers and  
997 the level of risk assigned to the research.

998 - Opening visit of each center: before inclusion, for a protocol implementation and  
999 acquaintance with the various biomedical research stakeholders.

1000 - During subsequent visits, the notebooks will be reviewed as the research progresses by  
1001 the CRA. The lead investigator at each center, as well as other investigators who include  
1002 or track individuals involved in the research, are committed to receiving CRA at regular  
1003 intervals.

1004 During these site visits and in accordance with Good Clinical Practice, the following  
1005 elements will be reviewed:

1006 - adherence to the research protocol and procedures,

1007 - verification of informed patient consent

1008 - examination of the source documents and comparison with the data reported in the  
1009 observation book as to accuracy, missing data, consistency of the data according to the  
1010 rules laid down by the DRCD procedures.

1011

1012 - Closing visit: retrieval of observation books, balance sheet at the pharmacy, biomedical  
1013 research documents, archiving.

1014

1015 **10.2 Transcription of data into the case report form (CRF)**

1016 All information required by the protocol should be provided in the CRF and an  
1017 explanation given by the investigator for each missing data. The data will have to be  
1018 transferred to the CRF as they are obtained, whether clinical or paraclinical data. The data  
1019 must be copied clearly and legibly in black ink into these CRF (this will facilitate duplication  
1020 and computer input). The erroneous data detected on the CRF will be clearly crossed out and  
1021 the new data will be copied to the CRF with the initials and date by the investigator's team  
1022 member who made the correction.

1023 The anonymity of the subjects will be ensured by a code number and initials of the person  
1024 who is willing to search on all documents necessary for the search, or by deleting by  
1025 appropriate means personal data on copies of source documents for research documentation.

1026 The computerized data on a file will be declared to the CNIL according to the procedure  
1027 adapted to the case.

1028

1029 **11. LEGAL AND ETHICAL CONSIDERATIONS**

1030 The promoter is defined by Act 2004-806 of 9 August 2004. In this research, AP-HP is  
1031 the sponsor and the Department of Clinical Research and Development (DRCD) carries out its  
1032 regulatory missions.

1033

1034 **11.1 Application to the ANSM authorization**

1035 In order to start the search, the AP-HP as sponsor must submit an application for  
1036 ANSM authorization. The competent authority, as defined in Article L. 1123-12, pronounces  
1037 itself with regard to the safety of persons who lend themselves to biomedical research, taking  
1038 into account in particular the safety and quality of products used during research in  
1039 accordance, where applicable, with the applicable standards, their condition of use and the  
1040 safety of persons with regard to acts performed and methods used, as well as the procedures  
1041 laid down for monitoring persons.

1042

1043 **11.2 Request for the Ethical Committee decision**

1044 In accordance with article L. 1123-6 of the French Public Health Code, the research  
1045 protocol must be submitted by the sponsor to an ethical committee (Comité de Protection des  
1046 Personnes, CPP). The opinion of this committee shall be notified to the competent authority  
1047 by the promoter before the start of the research.

1048

1049 **11.3 Amendment**

1050 DRCD should be informed of any proposed protocol changes by the coordinating  
1051 investigator. The amendments will have to be qualified as substantial or not. A substantial  
1052 change is a change that can, in one way or another, modify the guarantees given to those who  
1053 lend themselves to biomedical research (amendment of an inclusion criterion, extension of an  
1054 inclusion period, participation of new centers, etc.).

1055 After the start of the research, any substantial modification of the research at the  
1056 initiative of the sponsor must obtain, prior to its implementation, a favorable opinion from the  
1057 CPP and an authorization from the competent authority. In this case, if necessary, the CPP  
1058 ensures that a new consent of the research participants is obtained.

1059 In addition, any extension of research (deeply modifying the therapeutic regimen or  
1060 the populations included, extending treatments and/or therapeutic acts not initially provided  
1061 for in the protocol) must be considered as new research.

1062 Substantial changes will require the sponsor to submit an application for authorization  
1063 to the ANSM and/or a request for an opinion from the PPC.

1064

1065 **11.4 CNIL declaration**

1066 The law provides that the declaration of the computerized file of personal data  
1067 collected for research must be made before the actual start of the research.

1068 A reference methodology specific to the processing of personal data carried out within  
1069 the framework of biomedical research defined by law 2004-806 of August 9, 2004, as it falls  
1070 within the scope of articles L. 1121-1 and following of the French Public Health Code was  
1071 established by the CNIL in January 2006. This methodology allows for a simplified reporting  
1072 procedure when the nature of the data collected in the research is compatible with the list  
1073 provided by the CNIL in its reference document.

1074 When the protocol benefits from data quality control by a CRA representing the  
1075 promoter and falls within the scope of the simplified CNIL procedure, the DRCD as promoter  
1076 will ask the promoter to make a written commitment to comply with the simplified MR001  
1077 reference methodology.

1078

1079 **11.5 Information note and informed consent**

1080 Written consent must be obtained from any person who is suitable for research prior to  
1081 any act required for biomedical research.

1082 Failing this, an emergency inclusion procedure may be carried out by the investigating  
1083 physician in charge of the patient. As soon as possible, the relative and the patient will be  
1084 informed and the patient's written consent will be obtained for the eventual continuation of the  
1085 research.

1086 There will be 3 types of consents:

- 1087 - one for the patient if he/she is able to sign it at the time of inclusion
- 1088 - one for the parent or close relative if present when the patient is unable to sign consent
- 1089 - one for the patient when he wakes up to authorize further research

1090

1091 **11.6 Final research report**

1092 The final research report will be written collaboratively by the coordinator and  
1093 biostatistician for this research. This report will be submitted to each investigator for  
1094 comment. Once a consensus has been reached, the final version should be endorsed by each  
1095 investigator's signature and sent to the sponsor as soon as possible after the actual completion  
1096 of the research. A report prepared in accordance with the Competent Authority's reference  
1097 plan shall be forwarded to the Competent Authority and the PPC within one year of the  
1098 completion of the research,

1099

1100 **12. DATA PROCESSING AND STORAGE OF RESEARCH DOCUMENTS AND**  
1101 **DATA**

1102 Research documents within the scope of the Biomedical Research Act must be archived  
1103 by all parties for a period of 15 years after the end of the research. (See BPCs, Chapter 8:  
1104 Essential documents). This indexed archive includes:

- 1105 - copies of the ANSM authorization letter and the mandatory notice from the CPP;
- 1106 - successive versions of the protocol (identified by version number and version date);
- 1107 - correspondence letters with the promoter;
- 1108 - signed consents of the subjects under sealed cover with the inclusion list or register in  
1109 correspondence;
- 1110 - the completed and validated observation book of each subject included;
- 1111 - all specific annexes to the study;
- 1112 - the final report of the study from the statistical analysis and quality control of the study  
1113 (double sent to the sponsor);

1114 - any audit certificates that may have been issued during the course of the research.

1115 The database that gave rise to the statistical analysis must also be archived by the person in  
1116 charge of the analysis (paper or computer support).

1117

### 1118 **13. INSURANCE AND SCIENTIFIC COMMITMENT**

#### 1119 **13.1. Insurance**

1120 Assistance Publique - Hôpitaux de Paris is the promoter of this research. In accordance  
1121 with the law on biomedical research, it has taken out insurance with HDI-GERLING for the  
1122 entire duration of the research, guaranteeing its own civil liability as well as that of any  
1123 intervener (physician or personnel involved in the research) (law n°2004-806, Art L. 1121-10  
1124 of the CSP).

1125 Assistance Publique - Hôpitaux de Paris reserves the right to interrupt the research at any  
1126 time for medical or administrative reasons. In this case, a notification will be given to the  
1127 investigator.

1128

#### 1129 **13.2. Scientific commitment**

1130 Each investigator will undertake to respect the obligations of the law and to conduct the  
1131 research in accordance with the Good Clinical Practice, respecting the terms of the Helsinki  
1132 Declaration. To this end, a copy of the scientific commitment (DCDD-type document) dated  
1133 and signed by each investigator in each clinical department of a participating center will be  
1134 given to the sponsor's representative.

1135

### 1136 **14. PUBLISHING RULES**

1137 Assistance Publique - Hopitaux de Paris owns the data and no use or transmission to a  
1138 third party may be made without its prior consent.

1139 Only one publication in an international journal is envisaged. Investigators will be  
1140 divided into a short list (authors) and an exhaustive list of investigators listed in the appendix  
1141 to the article. For authors, the following rules will apply. The first signatory of the publication  
1142 will be Dr. Birenbaum, the second last signatory will be Dr. François Lenfant, and the last  
1143 signatory will be Pr. Riou. The additional authors (1 per center) will be designated by each  
1144 center, and the order will be determined by the number of patients included by each center.  
1145 Only centers with more than 100 patients can claim to have an author on this list. An annex  
1146 list of investigators will be drawn up, with each center being able to propose a maximum of 2

1147 investigators in this list. Writing of the initial draft will be performed by Dr. Birenbaum. All  
1148 selected authors will participate in the reading of the final manuscript. A scientific editorial  
1149 steering committee is responsible for compliance with these rules and will resolve any  
1150 disputes (Dr. Aurélie Birenbaum, Dr. François Lenfant, Pr. Bruno Riou).

1151 Assistance Publique - Hôpitaux de Paris must be mentioned as the promoter of  
1152 biomedical research and as financial support where appropriate. The words "Assistance  
1153 Publique - Hôpitaux de Paris" must appear in the authors' addresses.

1154

1155 **REFERENCES**

- 1156 1. Smith G, Ng A: Gastric reflux and pulmonary aspiration in anaesthesia. *Minerva Anesthesiol*  
1157 2003; 69: 402-6
- 1158 2. Warner MA, Warner ME, Weber JG: Clinical significance of pulmonary aspiration during  
1159 the perioperative period. *Anesthesiology* 1993; 78: 56-62
- 1160 3. Olsson GL, Hallen B, Hambraeus-Jonzon K: Aspiration during anaesthesia: a computer-  
1161 aided study of 185,358 anaesthetics. *Acta Anaesthesiol Scand* 1986; 30: 84-92
- 1162 4. Molliex S, Berset JC, Billard V, Bunouf E, Delort-Laval S, Frering B, Freysz M,  
1163 Laccourreyre O, Lugrin D, Mustaki JP, Penon C, Sztark F, Tueux O: Prise en charge des  
1164 voies aériennes en anesthésie adulte à l'exception de l'intubation difficile. Conférence de  
1165 consensus. *Ann Fr Anesth Reanim* 2003; 22: 745-9
- 1166 5. Sellick BA: Cricoid pressure to control regurgitation of stomach contents during induction  
1167 of anaesthesia. *Lancet* 1961; 2: 404-6
- 1168 6. Shirley PJ: The 'correct' application of cricoid pressure. *Anaesthesia* 2000; 55: 600
- 1169 7. El-Orbany M, Connolly LA: Rapid sequence induction and intubation: current controversy.  
1170 *Anesth Analg* 2010; 110: 1318-25
- 1171 8. Ovassapian A, Salem MR: Sellick's maneuver: to do or not do. *Anesth Analg* 2009; 109:  
1172 1360-2
- 1173 9. Smith KJ, Dobranowski J, Yip G, Dauphin A, Choi PT: Cricoid pressure displaces the  
1174 esophagus: an observational study using magnetic resonance imaging. *Anesthesiology* 2003;  
1175 99: 60-4
- 1176 10. Rice MJ, Mancuso AA, Gibbs C, Morey TE, Gravenstein N, Deitte LA: Cricoid pressure  
1177 results in compression of the postcricoid hypopharynx: the esophageal position is irrelevant.  
1178 *Anesth Analg* 2009; 109: 1546-52
- 1179 11. Benkhadra M, Lenfant F, Bry J, Astruc K, Trost O, Ricolfi F, Girard C, Trouilloud P,  
1180 Feigl G: Cricoid cartilage and esophagus: CT scan study of the dynamic variability of their  
1181 relative positions. *Surg Radiol Anat* 2009; 31: 537-43
- 1182 12. Tournadre JP, Chassard D, Berrada KR, Bouletreau P: Cricoid cartilage pressure  
1183 decreases lower esophageal sphincter tone. *Anesthesiology* 1997; 86: 7-9
- 1184 13. Chassard D, Tournadre JP, Berrada KR, Bouletreau P: Cricoid pressure decreases lower  
1185 oesophageal sphincter tone in anaesthetized pigs. *Can J Anaesth* 1996; 43: 414-7
- 1186 14. Aoyama K, Takenaka I, Sata T, Shigematsu A: Cricoid pressure impedes positioning and  
1187 ventilation through the laryngeal mask airway. *Can J Anaesth* 1996; 43: 1035-40
- 1188 15. Asai T, Barclay K, Power I, Vaughan RS: Cricoid pressure impedes placement of the  
1189 laryngeal mask airway and subsequent tracheal intubation through the mask. *Br J Anaesth*  
1190 1994; 72: 47-51
- 1191 16. Georgescu A, Miller JN, Lecklitner ML: The Sellick maneuver causing complete airway  
1192 obstruction. *Anesth Analg* 1992; 74: 457-9
- 1193 17. Haslam N, Parker L, Duggan JE: Effect of cricoid pressure on the view at laryngoscopy.  
1194 *Anaesthesia* 2005; 60: 41-7
- 1195 18. Levitan RM, Kinkle WC, Levin WJ, Everett WW: Laryngeal view during laryngoscopy: a  
1196 randomized trial comparing cricoid pressure, backward-upward-rightward pressure, and  
1197 bimanual laryngoscopy. *Ann Emerg Med* 2006; 47: 548-55
- 1198 19. Engelhardt T, Webster NR: Pulmonary aspiration of gastric contents in anaesthesia. *Br J*  
1199 *Anaesth* 1999; 83: 453-60
- 1200 20. Mort TC: Emergency tracheal intubation: complications associated with repeated  
1201 laryngoscopic attempts. *Anesth Analg* 2004; 99: 607-13, table of contents
- 1202 21. Martin LD, Mhyre JM, Shanks AM, Tremper KK, Kheterpal S: 3,423 emergency tracheal  
1203 intubations at a university hospital: airway outcomes and complications. *Anesthesiology*  
1204 2011; 114: 42-8
- 1205 22. Vanner RG, Pryle BJ: Regurgitation and oesophageal rupture with cricoid pressure: a  
1206 cadaver study. *Anaesthesia* 1992; 47: 732-5

- 1207 23. Notcutt W: Oesophageal rupture and cricoid pressure. *Anaesthesia* 1991; 46: 424-5  
1208 24. Ralph SJ, Wareham CA: Rupture of the oesophagus during cricoid pressure. *Anaesthesia*  
1209 1991; 46: 40-1  
1210 25. [Treatment of an injured adult presenting with vertebral-medullary trauma]. *Ann Fr*  
1211 *Anesth Reanim* 2004; 23: 930-45  
1212 26. Lewis S, Magee P: Contraindications to cricoid pressure. *Anaesthesia* 2003; 58: 1243-4  
1213 27. Brisson P, Brisson M: Variable application and misapplication of cricoid pressure. *J*  
1214 *Trauma* 2010; 69: 1182-4  
1215 28. Herman NL, Carter B, Van Decar TK: Cricoid pressure: teaching the recommended level.  
1216 *Anesth Analg* 1996; 83: 859-63  
1217 29. Flucker CJ, Hart E, Weisz M, Griffiths R, Ruth M: The 50-millilitre syringe as an  
1218 inexpensive training aid in the application of cricoid pressure. *Eur J Anaesthesiol* 2000; 17:  
1219 443-7  
1220 30. Kopka A, Robinson D: The 50 ml syringe training aid should be utilized immediately  
1221 before cricoid pressure application. *Eur J Emerg Med* 2005; 12: 155-8  
1222 31. Escott ME, Owen H, Strahan AD, Plummer JL: Cricoid pressure training: how useful are  
1223 descriptions of force? *Anaesth Intensive Care* 2003; 31: 388-91  
1224 32. Garrard A, Campbell AE, Turley A, Hall JE: The effect of mechanically-induced cricoid  
1225 force on lower oesophageal sphincter pressure in anaesthetised patients. *Anaesthesia* 2004;  
1226 59: 435-9  
1227 33. Vanner RG, O'Dwyer JP, Pryle BJ, Reynolds F: Upper oesophageal sphincter pressure  
1228 and the effect of cricoid pressure. *Anaesthesia* 1992; 47: 95-100  
1229 34. Howells TH, Chamney AR, Wraight WJ, Simons RS: The application of cricoid pressure.  
1230 An assessment and a survey of its practice. *Anaesthesia* 1983; 38: 457-60  
1231 35. Robinson JS, Thompson JM: Fatal aspiration (Mendelson's) syndrome despite antacids  
1232 and cricoid pressure. *Lancet* 1979; 2: 228-30  
1233 36. Kron SS: Questionable effectiveness of cricoid pressure in preventing aspiration.  
1234 *Anesthesiology* 1995; 83: 431-2  
1235 37. Snider DD, Clarke D, Finucane BT: The "BURP" maneuver worsens the glottic view  
1236 when applied in combination with cricoid pressure. *Can J Anaesth* 2005; 52: 100-4  
1237 38. Harris T, Ellis DY, Foster L, Lockey D: Cricoid pressure and laryngeal manipulation in  
1238 402 pre-hospital emergency anaesthetics: essential safety measure or a hindrance to rapid safe  
1239 intubation? *Resuscitation* 2010; 81: 810-6  
1240 39. Ball D, Mustafa A, Jefferson P: Cricoid pressure: implications for airway management.  
1241 *Anesth Analg* 2010; 110: 1753; author reply 1753  
1242 40. Asai T, Murao K, Shingu K: Cricoid pressure applied after placement of laryngeal mask  
1243 impedes subsequent fiberoptic tracheal intubation through mask. *Br J Anaesth* 2000; 85: 256-  
1244 61  
1245 41. Hartsilver EL, Vanner RG: Airway obstruction with cricoid pressure. *Anaesthesia* 2000;  
1246 55: 208-11  
1247 42. Sellick BA: Rupture of the oesophagus following cricoid pressure? *Anaesthesia* 1982; 37:  
1248 213-4  
1249 43. Notcutt WG: Rupture of the oesophagus following cricoid pressure. *Anaesthesia* 1981; 36:  
1250 911  
1251 44. Heath KJ, Palmer M, Fletcher SJ: Fracture of the cricoid cartilage after Sellick's  
1252 manoeuvre. *Br J Anaesth* 1996; 76: 877-8  
1253 45. Cormack RS, Lehane J: Difficult tracheal intubation in obstetrics. *Anaesthesia* 1984; 39:  
1254 1105-11  
1255 46. Diemunsch P, Langeron O, Richard M, Lenfant F: Prédiction et définition de la  
1256 ventilation au masque difficile et de l'intubation difficile. *Ann Fr Anesth Reanim* 2008; 27  
1257 : 3-14



1258 47. Amour J, Marmion F, Birenbaum A, Nicolas-Robin A, Coriat P, Riou B, Langeron O:  
1259 Comparison of plastic single-use and metal reusable laryngoscope blades for orotracheal  
1260 intubation during rapid sequence induction of anesthesia. *Anesthesiology* 2006; 104: 60-4  
1261 48. Flucker CJ, Hart E, Weisz M, Griffiths R, Ruth M. : The 50-millilitre syringe as an  
1262 inexpensive training aid in the application of cricoid pressure. *Eur J Anaesthesiol* 2000;  
1263 17(7):443-7  
1264  
1265  
1266  
1267

1268 13. APPENDIX :

1269  
1270  
1271  
1272  
1273  
1274  
1275

### APPENDIX 1 : Cormack and Lehane grade

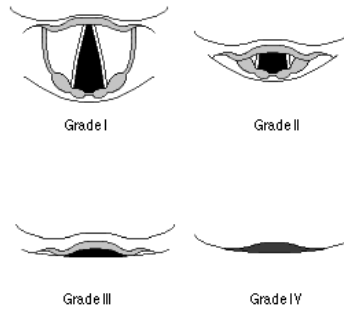

1276  
1277  
1278  
1279  
1280  
1281  
1282  
1283  
1284  
1285  
1286  
1287  
1288

### APPENDIX 2 : Mallampati score

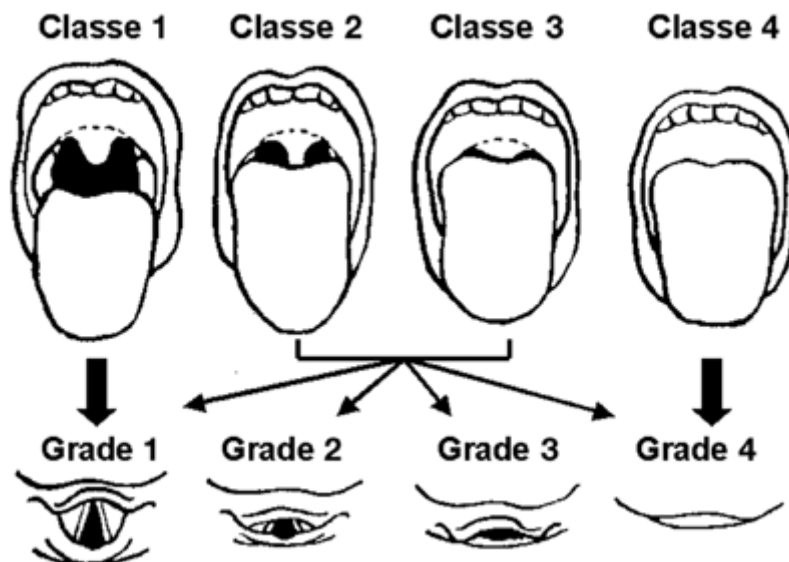

1289  
1290

1291  
1292

**APPENDIX 3 : Grid for Serious Adverse Events (SAE)**

**Undesirable Events Notification Grid for Biomedical Research Not Related to a Health Product**  
(Art. R. 1123-54 of French Public Health Code)

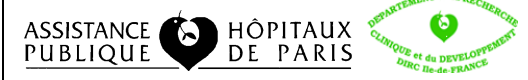

**IRIS** Project Code : P120120 Research Risk : **C** CSI / DSMB : YES  NO   
IDRCB 2013-A00624-41

**« IRIS, Assesment of the Sellick maneuver in rapid sequence induction of general anesthesia. Noninferiority trial »**

| <b>TO NOT BE NOTIFIED TO THE PROMOTER</b><br>Events listed in the protocol as not to be notified but which can be collected in the observation book (CRF)                                                                                                                                                                                                                                                                                                                                                                                                                                                                                                                                                         |                                                                                                                                                                                   | <b>TO BE NOTIFIED TO PROMOTER WITHOUT DELAY</b><br>Send the SAE notification form by fax (01 44 84 17 99) and fulfill the CRF                                                                                                                                                                                                                                                                                                                                                                                                                                                                                                                                                              |                                                                                                                                                                                                                                                                                                                                                                                                                                                                                                                                                                                                       |
|-------------------------------------------------------------------------------------------------------------------------------------------------------------------------------------------------------------------------------------------------------------------------------------------------------------------------------------------------------------------------------------------------------------------------------------------------------------------------------------------------------------------------------------------------------------------------------------------------------------------------------------------------------------------------------------------------------------------|-----------------------------------------------------------------------------------------------------------------------------------------------------------------------------------|--------------------------------------------------------------------------------------------------------------------------------------------------------------------------------------------------------------------------------------------------------------------------------------------------------------------------------------------------------------------------------------------------------------------------------------------------------------------------------------------------------------------------------------------------------------------------------------------------------------------------------------------------------------------------------------------|-------------------------------------------------------------------------------------------------------------------------------------------------------------------------------------------------------------------------------------------------------------------------------------------------------------------------------------------------------------------------------------------------------------------------------------------------------------------------------------------------------------------------------------------------------------------------------------------------------|
| <b>EVENTS THAT MAY BE SERIOUS BUT NOT RELATED TPO ACTS AND PROCEDURES ADDED BY THE RESEARCH</b>                                                                                                                                                                                                                                                                                                                                                                                                                                                                                                                                                                                                                   | <b>EXPECTED NON SERIOUS ADVERSE EVENTS</b>                                                                                                                                        | <b>EXPECTED SERIOUS ADVERSE EVENTS (SAE)</b>                                                                                                                                                                                                                                                                                                                                                                                                                                                                                                                                                                                                                                               | <b>UNEXPECTED SERIOUS ADVERSE EEVENTS (USAE)</b>                                                                                                                                                                                                                                                                                                                                                                                                                                                                                                                                                      |
| <p><u>Description:</u><br/>-Anything related to the natural and habitual evolution of the pathology:</p> <ul style="list-style-type: none"> <li>hospitalisation programmed or not to monitor the pathology;</li> <li>aggravation of the disease;</li> <li>ARDS not related to aspiration pneumonia;</li> <li>Severe sepsis not related to aspiration pneumonia;</li> <li>Septic shock not related to aspiration pneumonia;</li> <li>Reintubation not related to aspiration pneumonia;</li> <li>Post-operative non-invasive ventilation not related to aspiration pneumonia;</li> </ul> <p>-Any SAE that may be related to the treatments prescribed as part of the care during the follow-up of the research.</p> | <p><u>Description</u><br/>Adverse reactions related to rapid sequence induction</p> <ul style="list-style-type: none"> <li>dental breakage</li> <li>vocal cord lesions</li> </ul> | <p><u>Description</u><br/>- SAE related to rapid induction sequence</p> <ul style="list-style-type: none"> <li>Pulmonary aspiration</li> <li>Aspiration pneumonia</li> <li>ARDS related to aspiration pneumonia</li> <li>Severe sepsis related to aspiration pneumonia</li> <li>Septic shock related to aspiration pneumonia</li> </ul> <p>- SAE related to Sellick Maneuver</p> <ul style="list-style-type: none"> <li>Cricoid cartilage fracture</li> <li>Esophageal rupture</li> </ul> <p>- Other SAE</p> <ul style="list-style-type: none"> <li>Reintubation related to pulmonary aspiration</li> <li>Postoperative noninvasive ventilation related to pulmonary aspiration</li> </ul> | <p>Notify all events with one of the severity criteria noted below, except those identified in the protocol as not requiring notification:</p> <ol style="list-style-type: none"> <li>Death</li> <li>Life-threatening</li> <li>Requires or prolongs hospitalization</li> <li>Sustainable sequelae</li> <li>Congenital abnormality or malformation</li> <li>Event considered serious by the investigator (reason to be specified)</li> </ol> <p>WARNING: any discovery of PREGNANCY during biomedical research must be reported immediately to the sponsor and will be followed up until delivery.</p> |

1293

|                                                         |                                           |                                                  |                                               |                                                |
|---------------------------------------------------------|-------------------------------------------|--------------------------------------------------|-----------------------------------------------|------------------------------------------------|
| Name, surname and signature of principal investigator : | Name, surname and signature of URC chief: | Name, surname and signature of project referent: | Name, surname and signature of safety chief : | Name, surname and signature of medical chief : |
|---------------------------------------------------------|-------------------------------------------|--------------------------------------------------|-----------------------------------------------|------------------------------------------------|

1294
