# Supplementary material
Source: PubMed Central journal article supplement (PMC6439856)
Supplement: jamasurg-154-9-s002.pdf [file jamasurg-154-9-s002.pdf]

## Supplementary Online Content

Birenbaum A, Hajage D, Roche S, et al. Effect of the cricoid pressure compared with a sham procedure in the rapid sequence induction of anesthesia: the IRIS randomized clinical trial. *JAMA Surg*. Published online October 17, 2018.  
doi:10.1001/jamasurg.2018.3577

**eTable 1.** Recruitment in the 10 Academic Centers

**eTable 2.** Description of Adverse Events

This supplementary material has been provided by the authors to give readers additional information about their work.

**eTable 1:** Recruitment in the 10 academic centers

| Center                  | Patients             | Age       | Men      | Sellick Group |
|-------------------------|----------------------|-----------|----------|---------------|
|                         | No. (%) <sup>*</sup> | Mean (SD) | No. (%)  | No. (%)       |
| Pitié-Salpêtrière, APHP | 801 (23)             | 47 ± 20   | 454 (57) | 398 (50)      |
| Amiens                  | 596 (17)             | 54 ± 20   | 271 (45) | 299 (50)      |
| Beaujon, APHP           | 547 (16)             | 55 ± 15   | 265 (48) | 272 (50)      |
| Nîmes                   | 332 (10)             | 58 ± 16   | 163 (49) | 166 (50)      |
| Lille                   | 320 (9)              | 54 ± 21   | 175 (55) | 162 (51)      |
| Rouen                   | 265 (8)              | 50 ± 20   | 120 (45) | 134 (51)      |
| Bicêtre, APHP           | 260 (7)              | 47 ± 20   | 127 (49) | 128 (49)      |
| Bordeaux                | 152 (4)              | 43 ± 19   | 97 (64)  | 77 (51)       |
| Avicenne, APHP          | 132 (4)              | 47 ± 19   | 69 (52)  | 54 (49)       |
| Toulouse                | 66 (2)               | 49 ± 21   | 36 (55)  | 34 (51)       |

Abbreviations: SD: standard deviation; APHP: Assistance Publique-Hôpitaux de Paris. \*: the percentage refers to the total number of patients included (N=3,472)

**eTable 2:** Description of adverse events

| Variable                                                | Sellick Group<br>(n=1735) | Sham Group<br>(n=1736) |
|---------------------------------------------------------|---------------------------|------------------------|
| <b>NON SERIOUS ADVERSE EVENTS</b>                       |                           |                        |
| <b>Systematically recorded as criteria of judgement</b> |                           |                        |
| Pulmonary aspiration                                    | 10 (0.6)                  | 9 (0.6)                |
| Difficult intubation                                    | 72 (4)                    | 51 (3)                 |
| Non severe aspiration pneumopathy                       | 2 (0.2)                   | 2 (0.2)                |
| Traumatic complication                                  | 14 (0.8)                  | 9 (0.5)                |
| <b>Spontaneously declared by the investigator</b>       |                           |                        |
| Non severe aspiration pneumopathy <sup>a</sup>          | 1 (0.1)                   | 0 (0)                  |
| Non severe infectious pneumopathy                       | 4 (0.2)                   | 8 (0.5)                |
| Pulmonary atelectasis                                   | 0 (0)                     | 2 (0.1)                |
| Pneumothorax                                            | 1 (0.1)                   | 0 (0.1)                |
| Encephalopathy                                          | 1 (0.1)                   | 0 (0.1)                |
| Hemorrhage                                              | 1 (0.1)                   | 3 (0.2)                |
| Infections                                              | 5 (0.3)                   | 4 (0.2)                |
| Pancreatitis                                            | 1 (0.1)                   | 0 (0.1)                |
| Cholecystitis                                           | 2 (0.1)                   | 0 (0)                  |
| Renal insufficiency                                     | 2 (0.1)                   | 1 (0.1)                |
| Pulmonary embolism                                      | 1 (0.1)                   | 0 (0)                  |
| <b>SERIOUS ADVERSE EVENTS</b>                           |                           |                        |
| <b>Systematically recorded as criteria of judgement</b> |                           |                        |
| Mortality                                               | 30 (2)                    | 27 (2)                 |
| Admission into ICU                                      | 181 (10)                  | 201 (12)               |
| Severe aspiration pneumopathy                           | 2 (0.1)                   | 2 (0.1)                |
| Impossible tracheal intubation                          | 0 (0)                     | 1 (0.1)                |
| Postoperative tracheal reintubation                     | 2 (0.1)                   | 2 (0.1)                |
| Traumatic complication <sup>b</sup>                     | 3 (0.1)                   | 0 (0)                  |
| <b>Spontaneously declared by the investigator</b>       |                           |                        |
| Severe aspiration pneumopathy <sup>a</sup>              | 7 (0.4)                   | 7 (0.4)                |
| Severe infectious pneumopathy                           | 5 (0.3)                   | 3 (0.2)                |
| Pulmonary atelectasis                                   | 1 (0.1)                   | 0 (0)                  |
| ARDS                                                    | 4 (0.2)                   | 2 (0.2)                |
| Septic shock                                            | 8 (0.5)                   | 9 (0.5)                |
| Anaphylactic shock                                      | 3 (0.2)                   | 1 (0.1)                |
| Severe hemorrhage                                       | 3 (0.2)                   | 0 (0)                  |
| Multiple organ failure                                  | 0 (0)                     | 2 (0.1)                |
| Cardiac insufficiency                                   | 0 (0)                     | 2 (0.1)                |

|                           |         |         |
|---------------------------|---------|---------|
| Respiratory insufficiency | 0 (0)   | 1 (0.1) |
| Myocardial infarction     | 1 (0.1) | 0 (0)   |
| Peritonitis               | 3 (0.2) | 2 (0.1) |
| Stroke                    | 0 (0)   | 1 (0)   |
| Paraplegia                | 1 (0.1) | 0 (0)   |
| Bowel ischemia            | 1 (0.1) | 1 (0.1) |
| Bowel obstruction         | 1 (0.1) | 2 (0.1) |
| Urinary track obstruction | 0 (0)   | 1 (0.1) |
| Pulmonary embolism        | 1 (0.1) | 0 (0)   |
|                           |         |         |

Some patients had several adverse events and thus the sum of percentages does not equal 100%.

<sup>a</sup> : delayed, not related to anesthesia

<sup>b</sup> : tooth fracture

ICU: intensive care unit; ARDS: acute respiratory distress syndrome.
